# Supplementary material for: A Novel Bio-Inspired Ag/3D-TiO2/Si SERS Substrate with Ordered Moth-like Structure
Source: MDPI journal article supplement (doi:10.3390/nano12183127), 2022-09-09
Supplement: s1 [file s1]

# A Novel Bio-inspired Ag/3D-TiO<sub>2</sub>/Si SERS Substrate with Ordered Moth-like Structure

Jingguo Yang <sup>1,†</sup>, Florian Ion Tiberiu Petrescu <sup>2,†</sup>, Ying Li <sup>1</sup>, Dandan Song <sup>1</sup> and Gang Shi <sup>1,\*</sup>

<sup>1</sup> The Key Laboratory of Food Colloids and Biotechnology, Ministry of Education, School of Chemical and Material Engineering, Jiangnan University, Wuxi 214122, China

<sup>2</sup> Department of Mechanisms and Robots Theory, Bucharest Polytechnic University, Bucharest, Romania

\* Correspondence: gangshi@jiangnan.edu.cn; shigang0720@126.com

† These authors contributed equally to this work

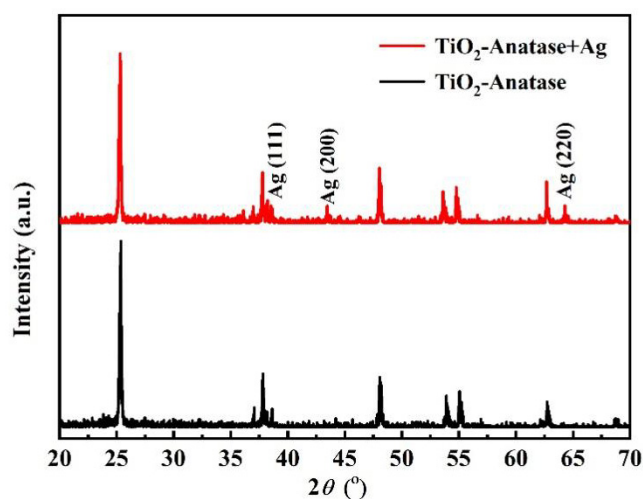

Figure S1. XRD of TiO<sub>2</sub> and TiO<sub>2</sub> deposited with Ag NPs.

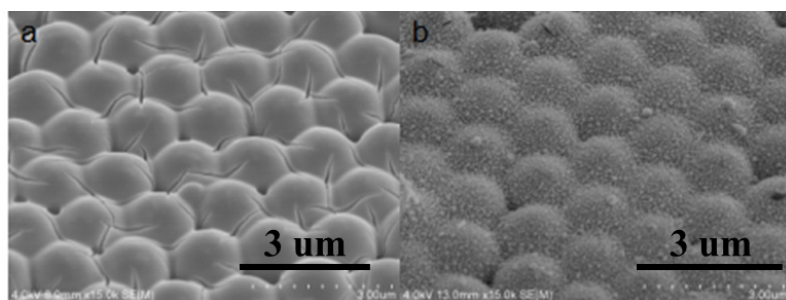

Figure S2. SEM images of (a) 2D-TiO<sub>2</sub>/Si and (b) Ag/2D-TiO<sub>2</sub>/Si.
